# Supplementary material for: Computational genetic neuroanatomy of the developing mouse brain: dimensionality reduction, visualization, and clustering
Source: PubMed Central journal article supplement (PMC3750329; doi:10.1186/1471-2105-14-222), 2013-07-11
Supplement: 1471-2105-14-222-S1.pdf [file 1471-2105-14-222-S1.pdf]

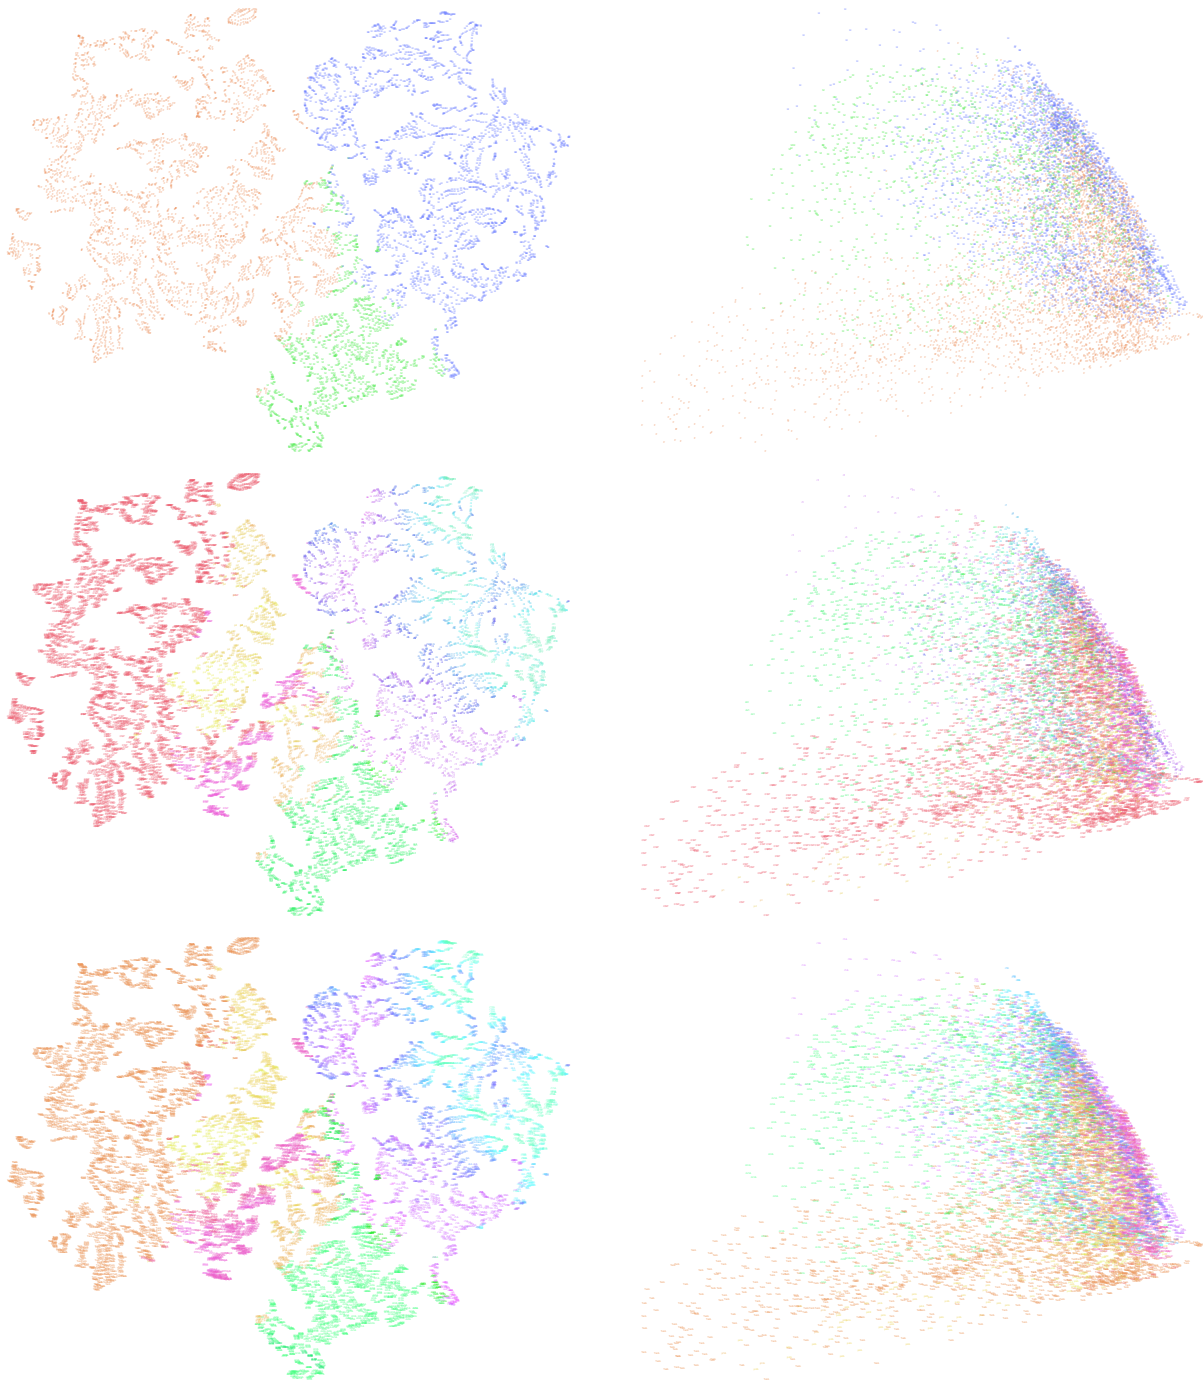

Figure 1: Visualization of the Allen Developing Mouse Brain Atlas data for age E13.5 after projecting to 2-D space using t-SNE (left column) and PCA (right column) at multiple levels of the ontology. The three rows correspond to Levels 1, 3, and 5. Each point corresponds to a brain voxel, which is displayed using the structure abbreviation and color of its Reference Atlas annotation.

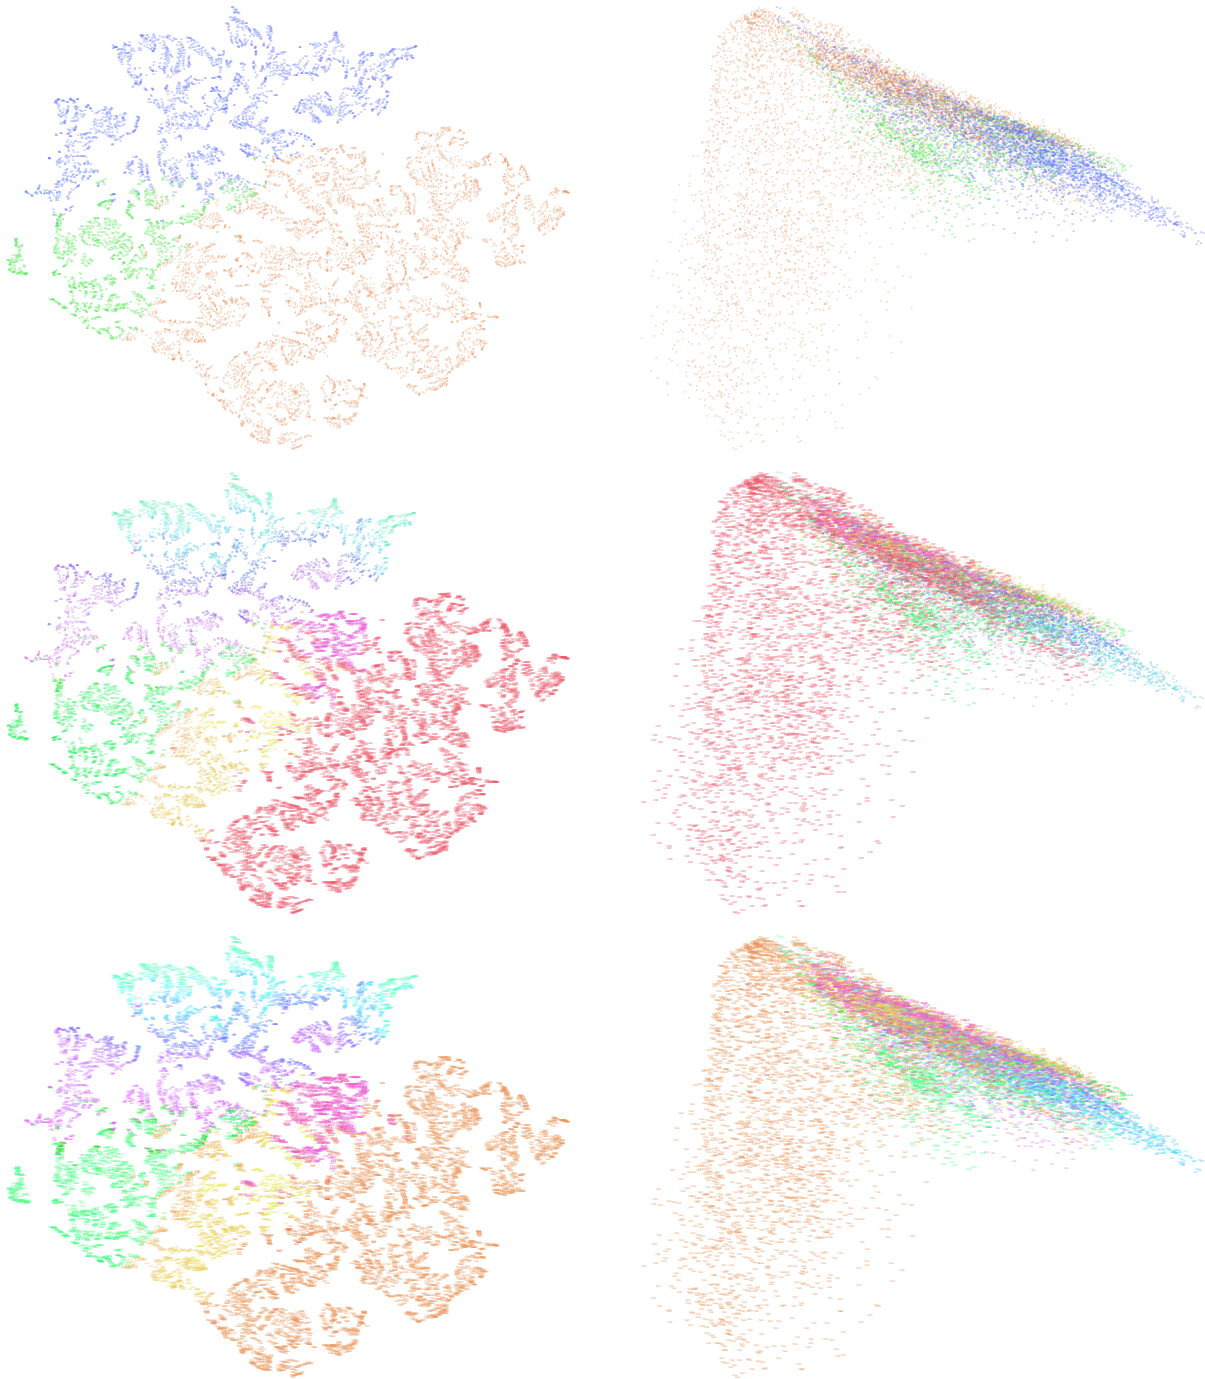

Figure 2: Visualization of the Allen Developing Mouse Brain Atlas data for age E15.5 after projecting to 2-D space using t-SNE (left column) and PCA (right column) at multiple levels of the ontology. The three rows correspond to Levels 1, 3, and 5. Each point corresponds to a brain voxel, which is displayed using the structure abbreviation and color of its Reference Atlas annotation.

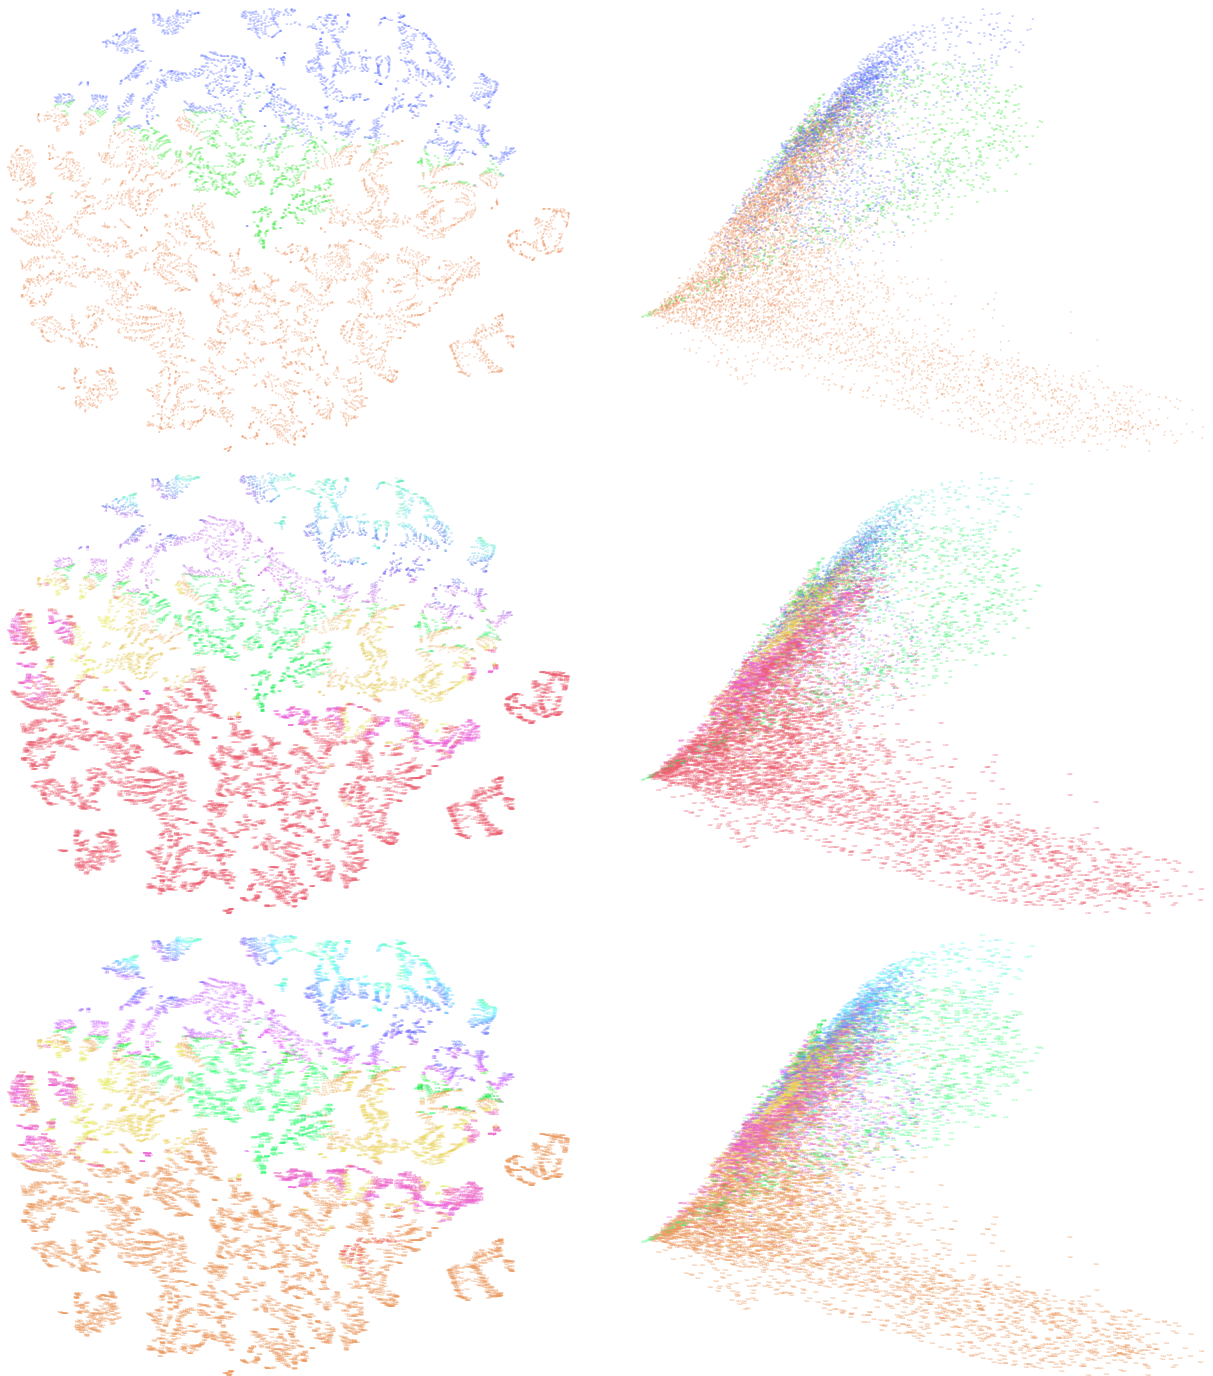

Figure 3: Visualization of the Allen Developing Mouse Brain Atlas data for age E18.5 after projecting to 2-D space using t-SNE (left column) and PCA (right column) at multiple levels of the ontology. The three rows correspond to Levels 1, 3, and 5. Each point corresponds to a brain voxel, which is displayed using the structure abbreviation and color of its Reference Atlas annotation.

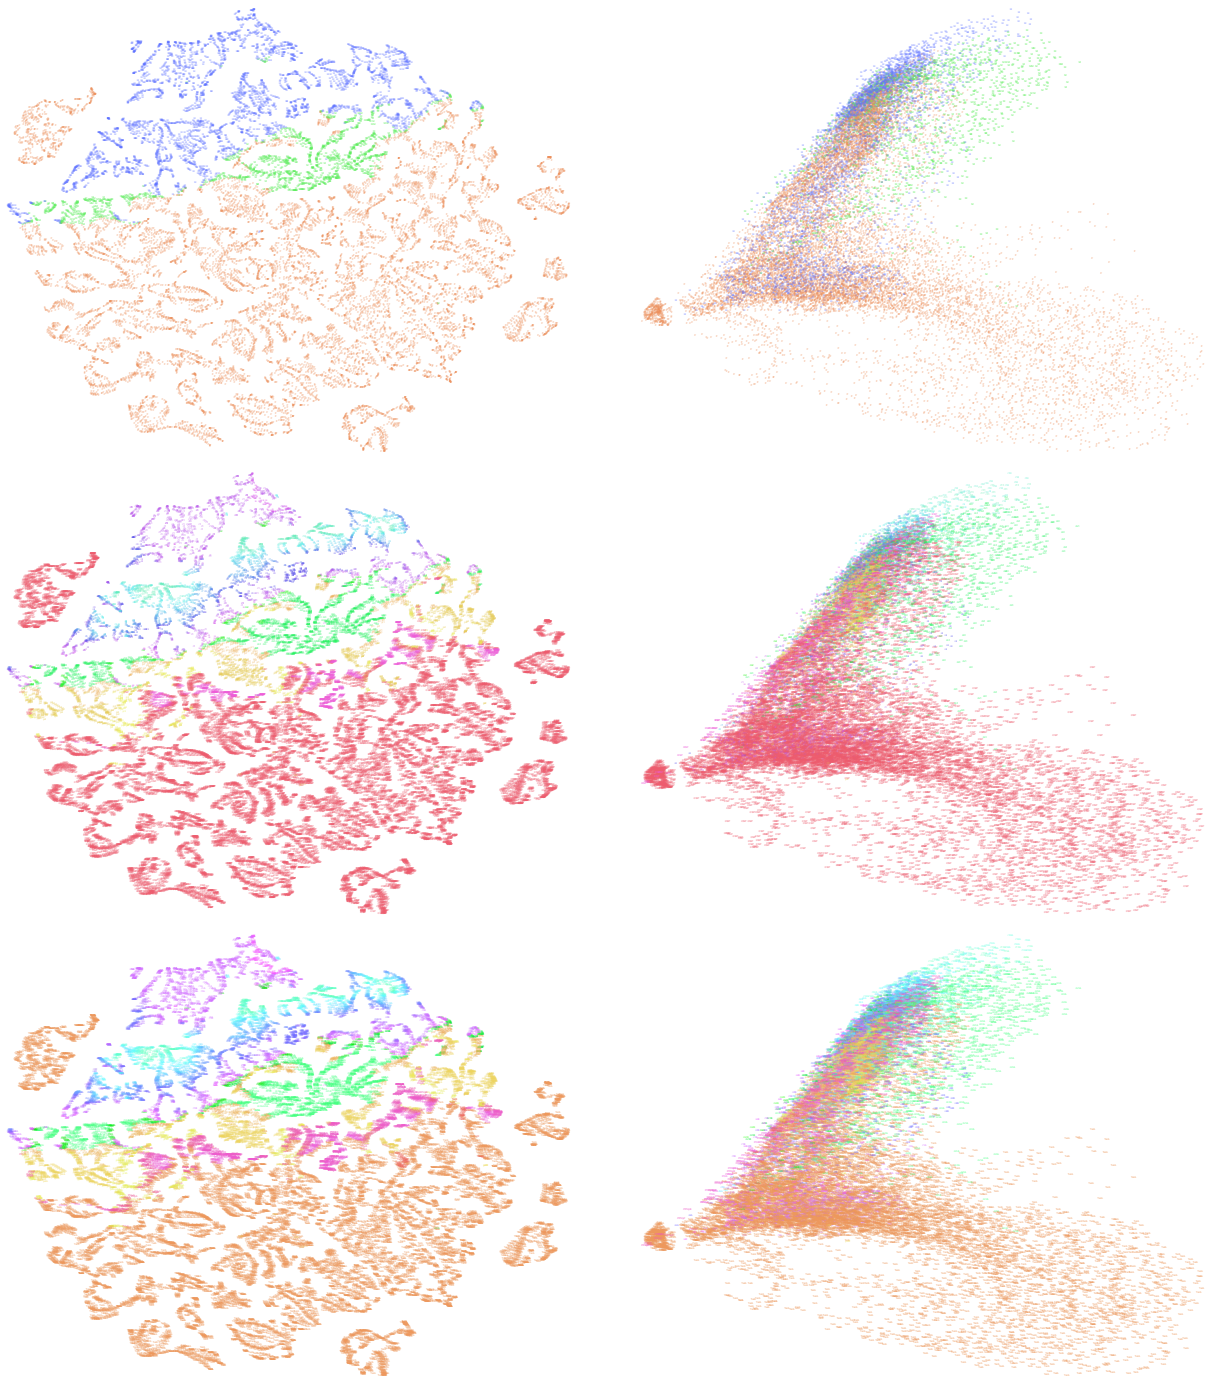

Figure 4: Visualization of the Allen Developing Mouse Brain Atlas data for age P4 after projecting to 2-D space using t-SNE (left column) and PCA (right column) at multiple levels of the ontology. The three rows correspond to Levels 1, 3, and 5. Each point corresponds to a brain voxel, which is displayed using the structure abbreviation and color of its Reference Atlas annotation.

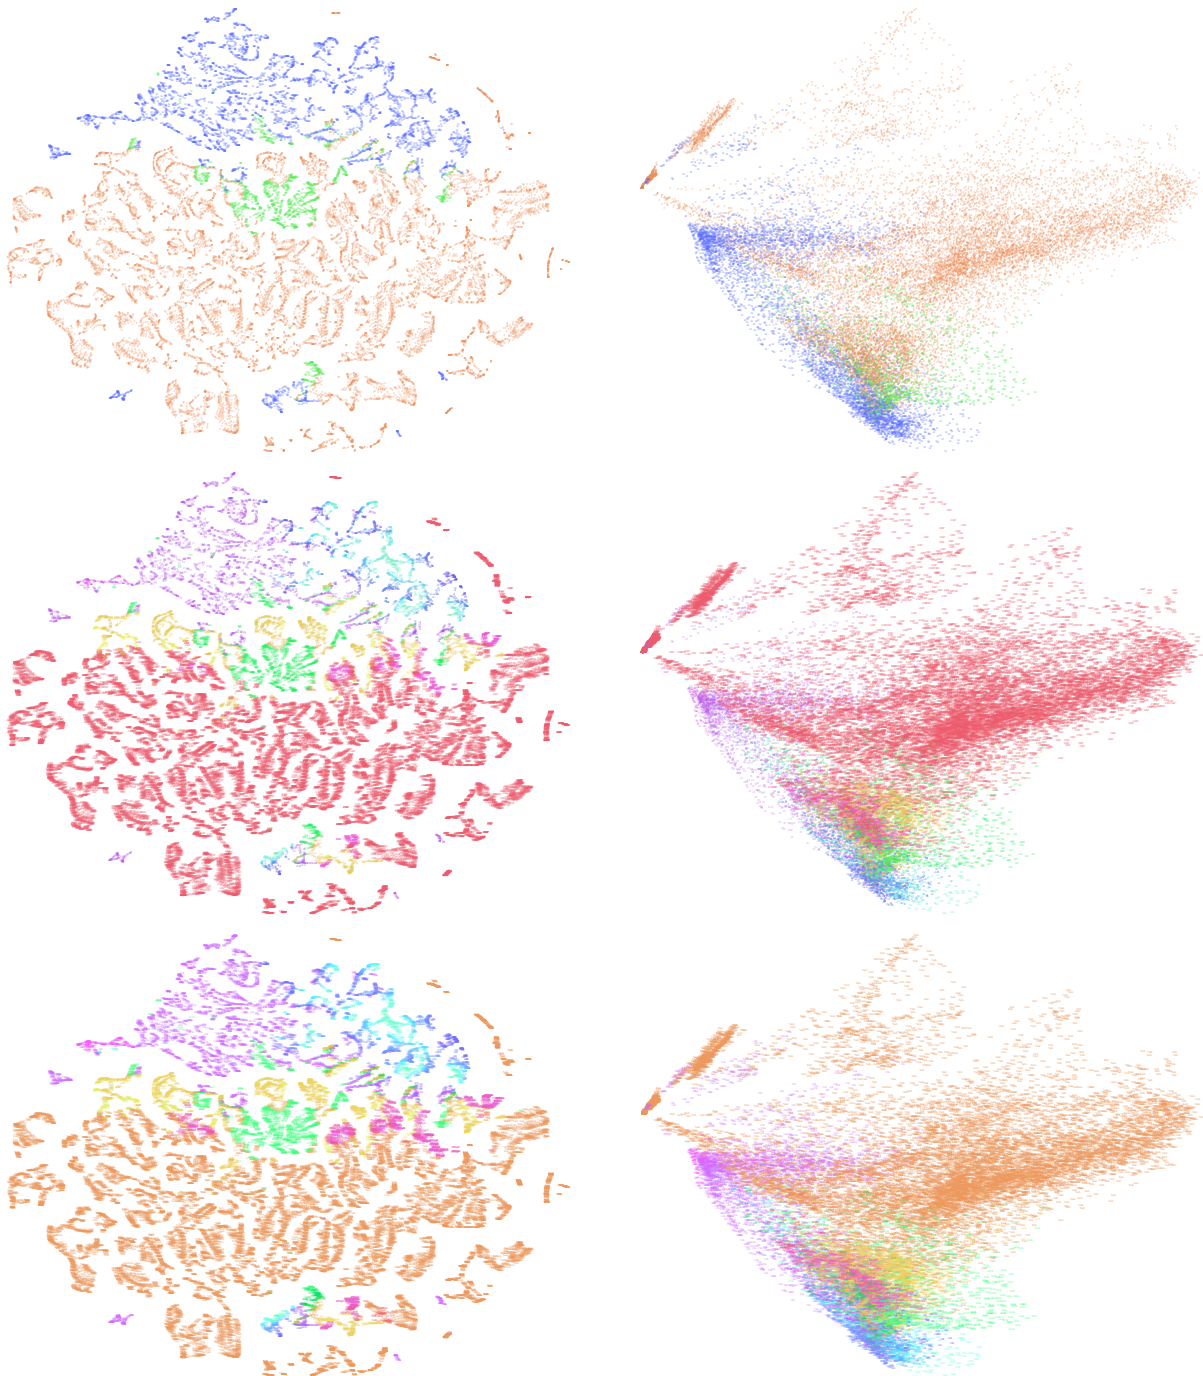

Figure 5: Visualization of the Allen Developing Mouse Brain Atlas data for age P14 after projecting to 2-D space using t-SNE (left column) and PCA (right column) at multiple levels of the ontology. The three rows correspond to Levels 1, 3, and 5. Each point corresponds to a brain voxel, which is displayed using the structure abbreviation and color of its Reference Atlas annotation.

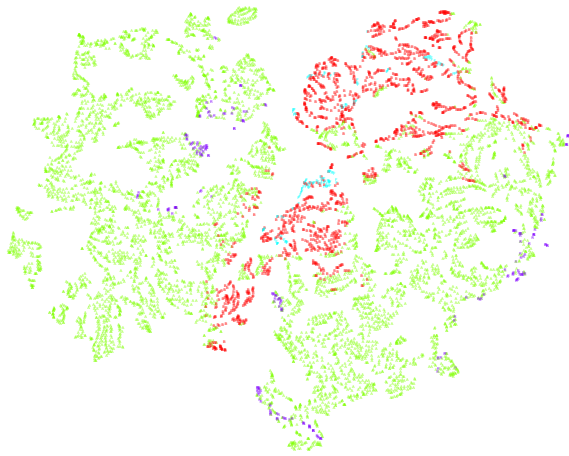

t-SNE, E13.5

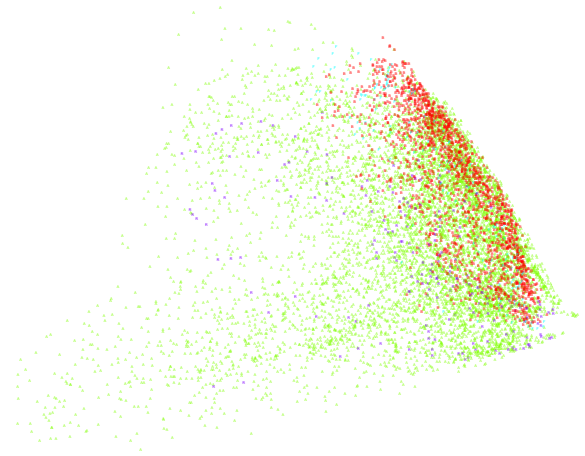

PCA, E13.5

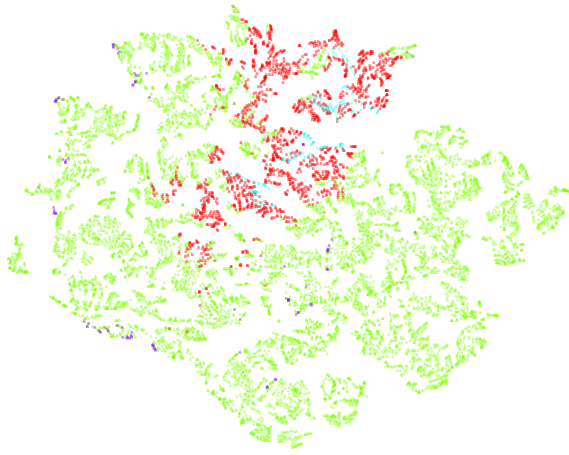

t-SNE, E15.5

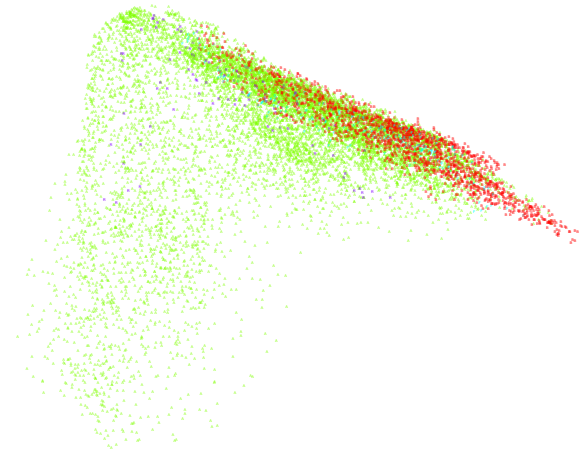

PCA, E15.5

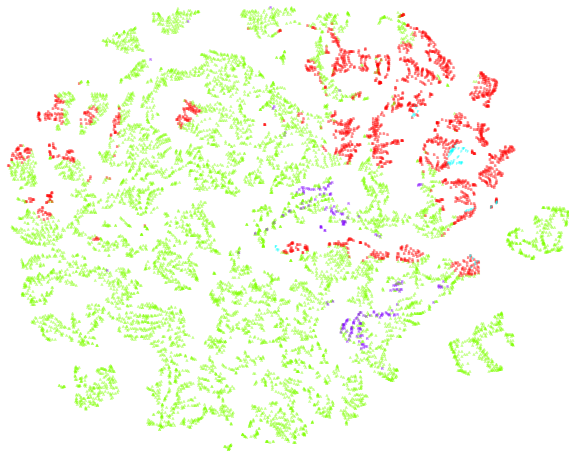

t-SNE, E18.5

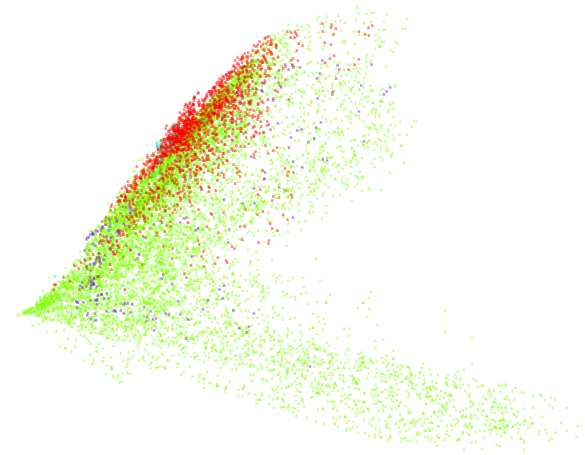

PCA, E18.5

Figure 6: Visualization of the Allen Developing Mouse Brain Atlas data after projecting to 2-D space using t-SNE and PCA. Each point corresponds to a brain voxel, which is displayed according to the longitudinal zones (F=floor, B=basal, A=alar, R=roof) it belongs to.

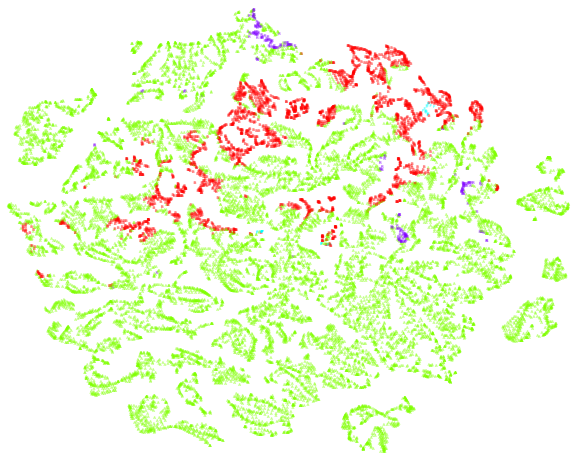

t-SNE, P4

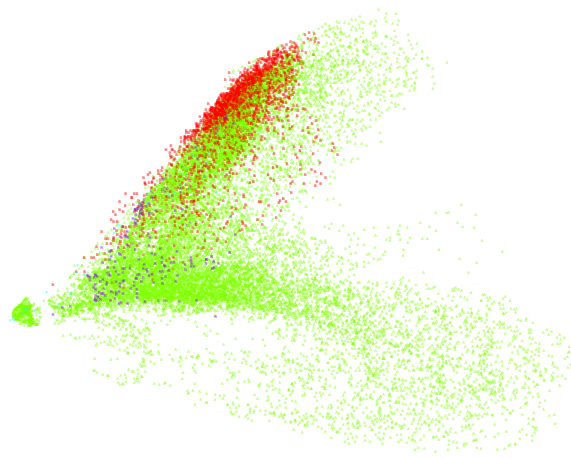

PCA, P4

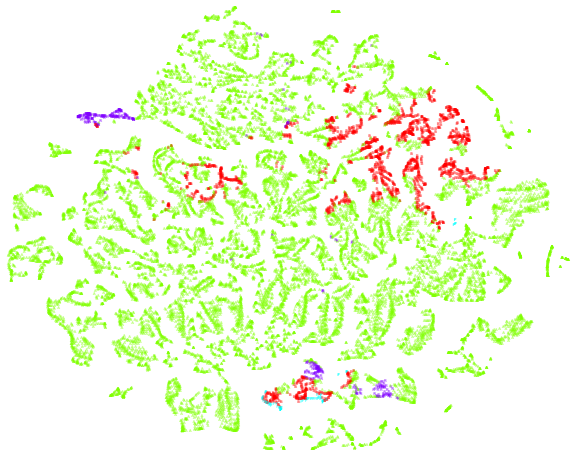

t-SNE, P14

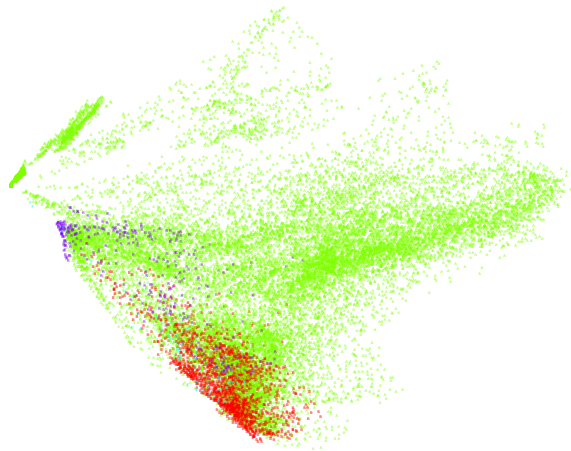

PCA, P14

Figure 7: Visualization of the Allen Developing Mouse Brain Atlas data after projecting to 2-D space using t-SNE and PCA. Each point corresponds to a brain voxel, which is displayed according to the longitudinal zones (F=floor, B=basal, A=alar, R=roof) it belongs to.
